# Supplementary material for: The high diversity of SARS-CoV-2-related coronaviruses in pangolins alerts potential ecological risks
Source: PubMed Central journal article supplement — Zool Res. 2021 Nov 18;42(6):834–44. doi: 10.24272/j.issn.2095-8137.2021.334 (PMC8645874; doi:10.24272/j.issn.2095-8137.2021.334), 2021-11-18
Supplement: zr-42-6-834-S1.pdf [file zr-42-6-834-S1.pdf]

## Supplementary Materials

**Supplementary Table S1. Previous studies on the possible roles of pangolins in the evolution and cross-species transmission of SARS-CoV-2 and SC2r-Cov**

| Methodology                                                                                                                              | Reference(s)                                                       | Natural host | Incidental host      | Intermediate host |
|------------------------------------------------------------------------------------------------------------------------------------------|--------------------------------------------------------------------|--------------|----------------------|-------------------|
| <b>Genetic analysis:</b>                                                                                                                 |                                                                    |              |                      |                   |
| ● The genomic divergence between pangolin-CoVs and SARS-CoV-2 is larger than that between bat-CoVs and SARS-CoV-2.                       | Lam, et al. 2020; Liu, et al. 2020; Zhang, et al. 2020             | In favor     | No conflict          | Against           |
| ● The sequences of S protein RBDs from some pangolin-CoVs share the highest amino acid identity with SARS-CoV-2.                         | Xiao, et al. 2020                                                  | No conflict  | No conflict          | In favor          |
| ● Synonymous substitutions in the RBD suggest that RaTG13 is more closely related to SARS-CoV-2 than are pangolin-CoVs.                  | Lam, et al. 2020                                                   | No conflict  | No conflict          | Against           |
| ● There is high genetic diversity among the lineages of pangolin-CoVs.                                                                   | Lam, et al. 2020; Liu, et al. 2020; Zhang, et al. 2020; This study | In favor     | Against/No conflict* | No conflict       |
| <b>Clinical observation:</b>                                                                                                             |                                                                    |              |                      |                   |
| ● Some pangolins infected by pangolin-CoVs show disease symptoms.                                                                        | Liu, et al. 2019; Liu, et al. 2020; Xiao, et al. 2020              | Against      | In favor             | In favor          |
| ● The S protein constructs based on the sequence of pangolin-CoV bind the pangolin ACE2 receptor.                                        | Niu, et al. 2021; Wrobel, et al. 2021                              | No conflict  | In favor             | In favor          |
| ● PCR screening detected positive signals for pangolin-CoVs in three pangolins seized in Guangdong without pathological symptoms.        | Li, Wang, Hua, et al. 2021                                         | In favor     | No conflict          | No conflict       |
| <b>Survey:</b>                                                                                                                           |                                                                    |              |                      |                   |
| ● PCR screening of 334 live pangolins confiscated from Peninsular Malaysia and Borneo from 2009–2019 yielded no positive results.        | Lee, et al. 2020                                                   | Against      | In favor             | No conflict       |
| ● The SARS-CoV-2 surrogate virus neutralization test detected one positive pangolin sample confiscated within 2020 in southern Thailand. | Wacharapluesadee, et al. 2021                                      | In favor     | No conflict          | No conflict       |
| ● PCR screening and mtDNA analysis indicated that pangolins with positive of pangolin-CoVs are widely distributed in Southeast Asia.     | This study                                                         | In favor     | Against/No conflict* | No conflict       |

Note: \*Multiple spillover events were required.

**Supplementary Table S2. The representative 21 SC2r-CoV and SARSr-CoV genomes published previously**

| Host                             | Sample ID    | Accession No.  | Database | Reference                     |
|----------------------------------|--------------|----------------|----------|-------------------------------|
| <i>Manis javanica</i>            | GX/P5L       | EPI_ISL_410540 | GISAID   | Lam, et al. 2020              |
| <i>Rhinolophus malayanus</i>     | RmYN02       | EPI_ISL_412977 | GISAID   | Zhou, Chen, et al. 2020       |
| <i>Manis javanica</i>            | MP789        | MT121216       | GenBank  | Liu, et al. 2020              |
| <i>Rhinolophus affinis</i>       | RaTG13       | MN996532       | GenBank  | Zhou, Yang, et al. 2020       |
| <i>Homo sapiens</i>              | Wuhan-Hu-1   | MN908947       | GenBank  | Wu, et al. 2020               |
| <i>Rhinolophus pusillus</i>      | ZC45         | MG772933       | GenBank  | Hu, et al. 2018               |
| <i>Rhinolophus pusillus</i>      | ZXC21        | MG772934       | GenBank  | Hu, et al. 2018               |
| <i>Rhinolophus cornutus</i>      | Rc-o319      | LC556375       | GenBank  | Murakami, et al. 2020         |
| <i>Rhinolophus shameli</i>       | RshSTT200    | EPI_ISL_852605 | GISAID   | Hul, et al. 2021              |
| <i>Rhinolophus shameli</i>       | RshSTT182    | EPI_ISL_852604 | GISAID   | Hul, et al. 2021              |
| <i>Rhinolophus acuminatus</i>    | RacCS203     | MW251308       | GenBank  | Wacharapluesadee, et al. 2021 |
| <i>Rhinolophus sinicus</i>       | WIV1         | KF367457       | GenBank  | Ge, et al. 2013               |
| <i>Rhinolophus sinicus</i>       | HKU3-1       | DQ022305       | GenBank  | Lau, et al. 2005              |
| <i>Rhinolophus blasii</i>        | BM48-31      | NC_014470      | GenBank  | Drexler, et al. 2010          |
| <i>Rhinolophus affinis</i>       | LYRa11       | KF569996       | GenBank  | He, et al. 2014               |
| <i>Homo sapiens</i>              | BJ01         | AY278488       | GenBank  | Qin, et al. 2003              |
| <i>Rhinolophus monaceros</i>     | Longquan-140 | KF294457       | GenBank  | Lin, et al. 2017              |
| <i>Rhinolophus ferrumequinum</i> | HeB2013      | KJ473812       | GenBank  | Wu, et al. 2016               |
| <i>Rhinolophus ferrumequinum</i> | Rfl          | DQ412042       | GenBank  | Li, et al. 2005               |
| <i>Rhinolophus sp.</i>           | BtKY72       | KY352407       | GenBank  | Tao and Tong 2019             |
| <i>Rhinolophus blythi</i>        | PrC31        | MW703458       | GenBank  | Li, Wang, Ma, et al. 2021     |

**Supplementary Table S3. The number of viral RNA sequencing reads mapped to the 21 available SC2r-CoV and SARSr-CoV genomes**

| <b>Species</b>            | <b>Sample</b> | <b>Isolation date</b> | <b>NGS sequencing data</b> | <b>Number of reads mapped to the 21 SC2r-CoV and SARSr-CoV genomes</b> |
|---------------------------|---------------|-----------------------|----------------------------|------------------------------------------------------------------------|
| <i>Manis javanica</i>     | MJ18007       | 2018/12/06            | 16.6G                      | 0                                                                      |
| <i>Manis pentadactyla</i> | MP20          | 2017/08/29            | 17G                        | 12                                                                     |
| <i>Manis javanica</i>     | MJ57          | 2017/08/29            | 17.8G                      | 8                                                                      |
| <i>Manis javanica</i>     | MJ20          | 2017/08/29            | 17.5G                      | 0                                                                      |
| <i>Manis javanica</i>     | MJ54          | 2017/08/29            | 18.4G                      | 0                                                                      |

The aligned length of PE150 read to at least one SC2r-CoV or SARSr-CoV genome > 100 nucleotides.

**Supplementary Table S4. The divergence between MP20 and the reference genome of pangolin-CoV-GXC (GXP5L)**

|                       | dS     | dN     | dN/dS  | MP20<br>length<br>(nucleotide) | GXP5L<br>length<br>(nucleotide) | Aligned<br>length<br>(nucleotide) |
|-----------------------|--------|--------|--------|--------------------------------|---------------------------------|-----------------------------------|
| <b>Genome-average</b> | 0.1801 | 0.0106 | 0.0588 | 22446                          | 29184                           | 22446                             |
| <b><i>ORF1ab</i></b>  | 0.1853 | 0.0106 | 0.0571 | 16851                          | 21264                           | 16851                             |
| <b><i>S</i></b>       | 0.2422 | 0.0089 | 0.0369 | 2514                           | 3801                            | 2514                              |
| <b><i>ORF3a</i></b>   | 0.1821 | 0.0192 | 0.1054 | 642                            | 825                             | 642                               |
| <b><i>E</i></b>       | /      | /      | /      | 0                              | 225                             | 0                                 |
| <b><i>M</i></b>       | 0.0798 | 0.0023 | 0.0288 | 567                            | 666                             | 567                               |
| <b><i>ORF6</i></b>    | 0.2614 | 0.0133 | 0.0511 | 183                            | 183                             | 183                               |
| <b><i>ORF7a</i></b>   | 0.1641 | 0.0203 | 0.1235 | 324                            | 363                             | 324                               |
| <b><i>ORF7b</i></b>   | /      | /      | /      | 0                              | 129                             | 0                                 |
| <b><i>ORF8</i></b>    | /      | /      | /      | 0                              | 363                             | 0                                 |
| <b><i>N</i></b>       | 0.0667 | 0.0104 | 0.1564 | 1251                           | 1251                            | 1251                              |
| <b><i>ORF10</i></b>   | 0      | 0.0114 | NA     | 114                            | 114                             | 114                               |

**Supplementary Table S5. The divergence between pangolin-CoV-GDC (MP789) and pangolin-CoV-GXC (GXP5L)**

|                      | dS    | dN    | dN/dS | MP789<br>length<br>(nucleotide) | GXP5L<br>length<br>(nucleotide) | Aligned<br>length<br>(nucleotide) |
|----------------------|-------|-------|-------|---------------------------------|---------------------------------|-----------------------------------|
| <b>Genome-averag</b> | 0.715 | 0.060 | 0.084 |                                 |                                 |                                   |
| <b>e</b>             | 2     | 3     | 3     | 29139                           | 29184                           | 29097                             |
| <b>ORF1ab</b>        | 0.761 | 0.054 | 0.072 |                                 |                                 |                                   |
|                      | 2     | 9     | 1     | 21267                           | 21264                           | 21237                             |
| <b>S</b>             | 0.956 | 0.099 | 0.104 |                                 |                                 |                                   |
|                      | 2     | 7     | 2     | 3795                            | 3801                            | 3789                              |
| <b>ORF3a</b>         | 0.503 | 0.067 | 0.133 |                                 |                                 |                                   |
|                      | 3     | 2     | 5     | 825                             | 825                             | 825                               |
| <b>E</b>             | 0.075 | 0.006 | 0.079 |                                 |                                 |                                   |
|                      | 1     |       | 5     | 225                             | 225                             | 225                               |
| <b>M</b>             | 0.339 | 0.018 | 0.053 |                                 |                                 |                                   |
|                      | 2     |       | 1     | 666                             | 666                             | 666                               |
| <b>ORF6</b>          | 0.316 | 0.041 | 0.130 |                                 |                                 |                                   |
|                      | 8     | 3     | 4     | 183                             | 183                             | 183                               |
| <b>ORF7a</b>         | 0.518 | 0.076 | 0.147 |                                 |                                 |                                   |
|                      | 4     | 5     | 6     | 363                             | 363                             | 363                               |
| <b>ORF7b</b>         | 0.492 | 0.171 | 0.347 |                                 |                                 |                                   |
|                      | 6     | 1     | 3     | 129                             | 129                             | 129                               |
| <b>ORF8</b>          | 0.820 | 0.105 | 0.128 |                                 |                                 |                                   |
|                      | 1     | 2     | 3     | 315                             | 363                             | 315                               |
| <b>N</b>             | 0.277 | 0.041 | 0.147 |                                 |                                 |                                   |
|                      | 6     |       | 7     | 1257                            | 1251                            | 1251                              |
| <b>ORF10</b>         | 0.044 | 0.059 | 1.343 |                                 |                                 |                                   |
|                      | 2     | 4     | 9     | 114                             | 114                             | 114                               |

**Supplementary Table S6. The number of putative iHVs identified in sample MP20**

| <b>Position</b> | <b>Gene</b>   | <b>Coverage</b> | <b>Reference<br/>(GXP5L)</b> | <b>Alternative<br/>allele</b> | <b>Annotation</b> | <b>Amino acid change</b> |
|-----------------|---------------|-----------------|------------------------------|-------------------------------|-------------------|--------------------------|
| 1299            | <i>ORF1ab</i> | 43              | G (9)                        | T (34)                        | nonsynonymous     | p.Gly345Cys              |
| 6105            | <i>ORF1ab</i> | 6               | G (3)                        | T (3)                         | nonsynonymous     | p.Leu1947Phe             |
| 8096            | <i>ORF1ab</i> | 6               | T (3)                        | C (3)                         | synonymous        | p.Thr2610Thr             |
| 25389           | <i>ORF3</i>   | 7               | A (4)                        | G (3)                         | synonymous        | p.Val13Val               |
| 26530*          | <i>M</i>      | 5               | A (2)                        | C (2), T(1)                   | nonsynonymous     | p.Leu17Phe               |
| 29624           | 3' UTR        | 5               | C (2)                        | T (3)                         | intergenic_region |                          |

\*For position 26,530, both A>C and A>T cause Leu17Phe.

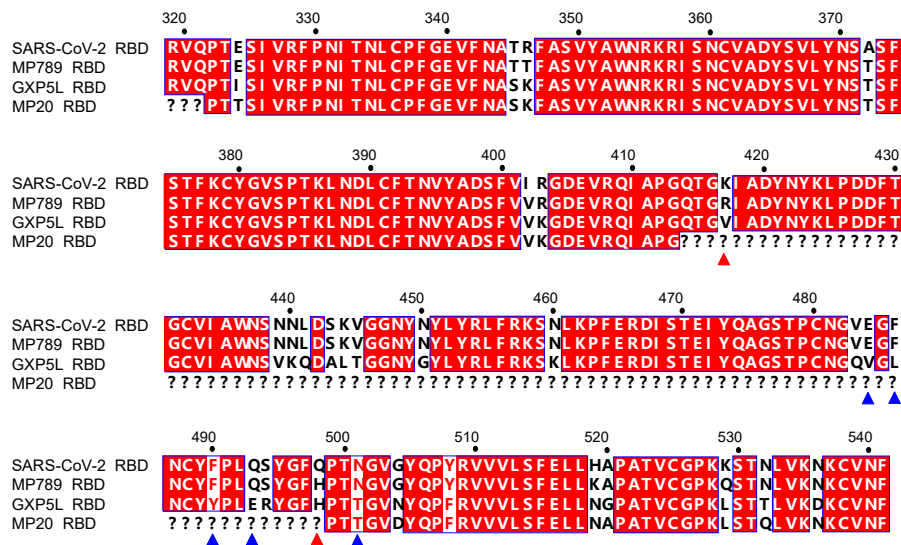

**Supplementary Figure S1. Alignment of spike protein receptor-binding domain (RBD) sequences from SARS-CoV-2, pangolin-CoV-GDC (MP789), pangolin-CoV-GXC (GXP5L), and MP20.**

The sites highlighted with colored triangles are the residue substitutions at the RBD binding sites of both pangolin-CoV-GDC and pangolin-CoV-GXC (two in red) and specifically of pangolin-CoV-GXC (five in blue) (Niu, et al. 2021). Identical residues are noted in red background, and similar residues are labeled in red boxed with blue frames. Two gaps (position 23266-23301 nt and 25577-25588 nt) filled by using MJ57 reads were not in the RBD (position 22488-23156 nt) of MP20.

## REFERENCES

- Drexler JF, Gloza-Rausch F, Glende J, Corman VM, Muth D, Goettsche M, Seebens A, Niedrig M, Pfefferle S, Yordanov S, et al. 2010. Genomic characterization of severe acute respiratory syndrome-related coronavirus in European bats and classification of coronaviruses based on partial RNA-dependent RNA polymerase gene sequences. *J Virol* 84(21):11336-11349.
- Ge XY, Li JL, Yang XL, Chmura AA, Zhu G, Epstein JH, Mazet JK, Hu B, Zhang W, Peng C, et al. 2013. Isolation and characterization of a bat SARS-like coronavirus that uses the ACE2 receptor. *Nature* 503(7477):535-538.
- He B, Zhang Y, Xu L, Yang W, Yang F, Feng Y, Xia L, Zhou J, Zhen W, Feng Y, et al. 2014. Identification of diverse alphacoronaviruses and genomic characterization of a novel severe acute respiratory syndrome-like coronavirus from bats in China. *J Virol* 88(12):7070-7082.
- Hu D, Zhu C, Ai L, He T, Wang Y, Ye F, Yang L, Ding C, Zhu X, Lv R, et al. 2018. Genomic characterization and infectivity of a novel SARS-like coronavirus in Chinese bats. *Emerg Microbes Infect* 7(1):154.
- Hul V, Delaune D, Karlsson EA, Hassanin A, Ou Tey P, Baidaliuk A, Gambaro F, Tu VT, Keatts L, Mazet J, et al. 2021. A novel SARS-CoV-2 related coronavirus in bats from Cambodia.

bioRxiv:10.1101/2021.1101.1126.428212.

- Lam TT, Jia N, Zhang YW, Shum MH, Jiang JF, Zhu HC, Tong YG, Shi YX, Ni XB, Liao YS, et al. 2020. Identifying SARS-CoV-2-related coronaviruses in Malayan pangolins. *Nature* 583(7815):282-285.
- Lau SK, Woo PC, Li KS, Huang Y, Tsoi HW, Wong BH, Wong SS, Leung SY, Chan KH, Yuen KY. 2005. Severe acute respiratory syndrome coronavirus-like virus in Chinese horseshoe bats. *Proc Natl Acad Sci U S A* 102(39):14040-14045.
- Lee J, Hughes T, Lee MH, Field H, Rovie-Ryan JJ, Sitam FT, Sipangkui S, Nathan S, Ramirez D, Kumar SV, et al. 2020. No evidence of coronaviruses or other potentially zoonotic viruses in Sunda pangolins (*Manis javanica*) entering the wildlife trade via Malaysia. *Ecohealth* 17(3):406-418.
- Li L, Wang X, Hua Y, Liu P, Zhou J, Chen J, An F, Hou F, Huang W, Chen J. 2021. Epidemiological study of Betacoronaviruses in captive Malayan pangolins. *Front Microbiol* 12:657439.
- Li LL, Wang JL, Ma XH, Sun XM, Li JS, Yang XF, Shi WF, Duan ZJ. 2021. A novel SARS-CoV-2 related coronavirus with complex recombination isolated from bats in Yunnan province, China. *Emerg Microbes Infect* 10(1):1683-1690.
- Li W, Shi Z, Yu M, Ren W, Smith C, Epstein JH, Wang H, Crameri G, Hu Z, Zhang H, et al. 2005. Bats are natural reservoirs of SARS-like coronaviruses. *Science* 310(5748):676-679.
- Lin XD, Wang W, Hao ZY, Wang ZX, Guo WP, Guan XQ, Wang MR, Wang HW, Zhou RH, Li MH, et al. 2017. Extensive diversity of coronaviruses in bats from China. *Virology* 507:1-10.
- Liu P, Chen W, Chen JP. 2019. Viral metagenomics revealed sendai virus and coronavirus infection of Malayan pangolins (*Manis javanica*). *Viruses* 11(11):979.
- Liu P, Jiang JZ, Wan XF, Hua Y, Li L, Zhou J, Wang X, Hou F, Chen J, Zou J, et al. 2020. Are pangolins the intermediate host of the 2019 novel coronavirus (SARS-CoV-2)? *PLoS Pathog* 16(5):e1008421.
- Murakami S, Kitamura T, Suzuki J, Sato R, Aoi T, Fujii M, Matsugo H, Kamiki H, Ishida H, Takenaka-Uema A, et al. 2020. Detection and characterization of bat sarbecovirus phylogenetically related to SARS-CoV-2, Japan. *Emerg Infect Dis* 26(12):3025-3029.
- Niu S, Wang J, Bai B, Wu L, Zheng A, Chen Q, Du P, Han P, Zhang Y, Jia Y, et al. 2021. Molecular basis of cross-species ACE2 interactions with SARS-CoV-2-like viruses of pangolin origin. *Embo j* 40(16):e107786.
- Qin E, Zhu Q, Yu M, Fan B, Chang G, Si B, Yang B, Peng W, Jiang T, Liu B, et al. 2003. A complete sequence and comparative analysis of a SARS-associated virus (Isolate BJ01). *Chin Sci Bull* 48(10):941-948.
- Tao Y, Tong S. 2019. Complete genome sequence of a severe acute respiratory syndrome-related coronavirus from Kenyan bats. *Microbiol Resour Announc* 8(28):e00548.
- Wacharapluesadee S, Tan CW, Maneeporn P, Duengkae P, Zhu F, Joyjinda Y, Kaewpom T, Chia WN, Ampoot W, Lim BL, et al. 2021. Evidence for SARS-CoV-2 related coronaviruses circulating in bats and pangolins in Southeast Asia. *Nat Commun* 12(1):972.
- Wrobel AG, Benton DJ, Xu P, Calder LJ, Borg A, Roustan C, Martin SR, Rosenthal PB, Skehel JJ, Gamblin SJ. 2021. Structure and binding properties of Pangolin-CoV spike glycoprotein inform the evolution of SARS-CoV-2. *Nat Commun* 12(1):837.
- Wu F, Zhao S, Yu B, Chen YM, Wang W, Song ZG, Hu Y, Tao ZW, Tian JH, Pei YY, et al. 2020. A new coronavirus associated with human respiratory disease in China. *Nature* 579(7798):265-269.



- Wu Z, Yang L, Ren X, He G, Zhang J, Yang J, Qian Z, Dong J, Sun L, Zhu Y, et al. 2016. Deciphering the bat virome catalog to better understand the ecological diversity of bat viruses and the bat origin of emerging infectious diseases. *Isme j* 10(3):609-620.
- Xiao K, Zhai J, Feng Y, Zhou N, Zhang X, Zou JJ, Li N, Guo Y, Li X, Shen X, et al. 2020. Isolation of SARS-CoV-2-related coronavirus from Malayan pangolins. *Nature* 583(7815):286-289.
- Zhang T, Wu Q, Zhang Z. 2020. Probable pangolin origin of SARS-CoV-2 associated with the COVID-19 outbreak. *Curr Biol* 30(7):1346-1351.e1342.
- Zhou H, Chen X, Hu T, Li J, Song H, Liu Y, Wang P, Liu D, Yang J, Holmes EC, et al. 2020. A novel bat coronavirus closely related to SARS-CoV-2 contains natural insertions at the S1/S2 cleavage site of the spike protein. *Curr Biol* 30(11):2196-2203.e2193.
- Zhou P, Yang XL, Wang XG, Hu B, Zhang L, Zhang W, Si HR, Zhu Y, Li B, Huang CL, et al. 2020. A pneumonia outbreak associated with a new coronavirus of probable bat origin. *Nature* 579(7798):270-273.
